# Supplementary material for: Regulation of histone H2A.Z expression is mediated by sirtuin 1 in prostate cancer
Source: PubMed Central journal article supplement (PMC3858554; doi:10.18632/oncotarget.1237), 2013-08-29
Supplement: oncotarget-04-1673-s002.pdf [file oncotarget-04-1673-s002.pdf]

## Regulation of histone H2A.Z expression is mediated by sirtuin 1 in prostate cancer

– Baptista et al

Supplementary Table 1 - Features of primers used on ChIP assays

| Gene         | Primer | Sequence | Distance from TSS            | T <sub>ANNEALING</sub> (°C) |    |
|--------------|--------|----------|------------------------------|-----------------------------|----|
| <i>H2AFZ</i> | A      | Forward  | 5' agcgtagctcgtctgtttc 3'    | -228bp                      | 60 |
|              |        | Reverse  | 5' atgagcaagcgaagaaaagg 3'   |                             |    |
|              | B      | Forward  | 5' gtgacttggttcaccgtt 3'     | -733bp                      | 60 |
|              |        | Reverse  | 5' ttcttcgtctagggcagtc 3'    |                             |    |
|              | C      | Forward  | 5' agacactactgtcccaagca 3'   | -1140bp                     | 60 |
|              |        | Reverse  | 5' gtccatgcaatgcaatcagt 3'   |                             |    |
| <i>SIRT1</i> | A      | Forward  | 5' tacacttcaggaagacgtggaa 3' | -310bp                      | 62 |
|              |        | Reverse  | 5' ccgctttctcaacttcttttc 3'  |                             |    |
|              | B      | Forward  | 5' tgcacgtgagaaaactgagg 3'   | -714bp                      | 62 |
|              |        | Reverse  | 5' accttgacgtggaggttg 3'     |                             |    |
|              | C      | Forward  | 5' tatggccagaaccataactagg 3' | -1127bp                     | 60 |
|              |        | Reverse  | 5' ggacctatataacctaggtag 3'  |                             |    |
